# Supplementary material for: Acute Effects of Ambient Air Pollution on Lower Respiratory Infections in Guangzhou Children of China
Source: Research Square preprint supplement (doi:10.21203/rs.3.rs-350683/v2), 2021-11-29
Supplement: Supplementary file 1 [file 6d6d3b0da2d5c8b3a82530e5.docx]

Table A1. Temporal spearman rank correlation coefficients among daily mean concentrations of ambient air pollutants

| **Variable** | **PM2.5** | **PM10** | **SO2** | **NO2** | **CO** | **O3** |
| --- | --- | --- | --- | --- | --- | --- |
| **Overall year** | | | | | | |
| PM2.5 | 1.00 |  |  |  |  |  |
| PM10 | 0.97 | 1.00 |  |  |  |  |
| SO2 | 0.70 | 0.73 | 1.00 |  |  |  |
| NO2 | 0.50 | 0.50 | 0.41 | 1.00 |  |  |
| CO | 0.62 | 0.75 | 0.37 | 0.35 | 1.00 |  |
| O3 | 0.30 | 0.35 | 0.29 | 0.06 | -0.20 | 1.00 |
| **Spring (March to May)** | | | | | | |
| PM2.5 | 1.00 |  |  |  |  |  |
| PM10 | 0.94 | 1.00 |  |  |  |  |
| SO2 | 0.71 | 0.71 | 1.00 |  |  |  |
| NO2 | 0.61 | 0.62 | 0.40 | 1.00 |  |  |
| CO | 0.51 | 0.36 | 0.31 | 0.24 | 1.00 |  |
| O3 | 0.19 | 0.31 | 0.22 | 0.11 | -0.28 | 1.00 |
| **Summer (June to August)** | | | | | | |
| PM2.5 | 1.00 |  |  |  |  |  |
| PM10 | 0.96 | 1.00 |  |  |  |  |
| SO2 | 0.59 | 0.62 | 1.00 |  |  |  |
| NO2 | 0.30 | 0.29 | 0.26 | 1.00 |  |  |
| CO | 0.74 | 0.66 | 0.34 | 0.37 | 1.00 |  |
| O3 | 0.66 | 0.69 | 0.39 | 0.10 | 0.24 | 1.00 |
| **Fall (September to November)** | | | | | | |
| PM2.5 | 1.00 |  |  |  |  |  |
| PM10 | 0.97 | 1.00 |  |  |  |  |
| SO2 | 0.75 | 0.80 | 1.00 |  |  |  |
| NO2 | 0.42 | 0.40 | 0.46 | 1.00 |  |  |
| CO | 0.53 | 0.51 | 0.38 | 0.40 | 1.00 |  |
| O3 | 0.50 | 0.50 | 0.36 | 0.11 | -0.15 | 1.00 |
| **Winter (December to February)** | | | | | | |
| PM2.5 | 1.00 |  |  |  |  |  |
| PM10 | 0.97 | 1.00 |  |  |  |  |
| SO2 | 0.80 | 0.83 | 1.00 |  |  |  |
| NO2 | 0.50 | 0.54 | 0.43 | 1.00 |  |  |
| CO | 0.57 | 0.57 | 0.43 | 0.29 | 1.00 |  |
| O3 | 0.26 | 0.26 | 0.33 | 0.15 | -0.31 | 1.00 |
