# Supplementary material for: Acute Effects of Ambient Air Pollution on Lower Respiratory Infections in Guangzhou Children of China
Source: Research Square preprint supplement (doi:10.21203/rs.3.rs-350683/v2), 2021-11-29
Supplement: Supplementary file 2 [file 863c76ef8acf8255862aeadc.docx]

Table A7. The coefficient of ambient air pollution concentrations in Lasso regression models with number of pneumonia microbial detection

| **Varible** | **PM2.5** | **PM10** | **SO2** | **NO2** | **CO** | **O3** | **RMSE** |
| --- | --- | --- | --- | --- | --- | --- | --- |
| Chlamydia pneumoniae | -0.025 | -0.003 | -0.081 | 0.049 | -0.002 | 0.008 | 0.276 |
| Haemophilus | -0.018 | -0.007 | -0.068 | 0.017 | 0.001 | -0.005 | 0.530 |
| Mycoplasma pneumoniae tuberculosis | -0.019 | 0.007 | -0.018 | 0.007 | 0.000 | 0.000 | 2.901 |
| Influenza A virus | 0.012 | / | -0.144 | 0.047 | -0.003 | 0.007 | 1.603 |
| Influenza B virus | 0.020 | -0.010 | -0.026 | 0.018 | -0.001 | 0.004 | 2.210 |
| Parainfluenza virus | -0.028 | / | -0.052 | 0.032 | / | 0.004 | 1.304 |
| Adenovirus | -0.013 | -0.012 | -0.004 | 0.023 | -0.000 | 0.005 | 0.759 |
| Respiratory Syncytial virus | -0.007 | -0.009 | -0.131 | 0.046 | -0.001 | 0.008 | 1.114 |
